# Supplementary material for: The carbon footprint of respiratory treatments in Europe and Canada: an observational study from the CARBON programme
Source: PubMed Central journal article supplement — Eur Respir J. 2022 Aug 11;60(2):2102760. doi: 10.1183/13993003.02760-2021 (PMC9363844; doi:10.1183/13993003.02760-2021), 2022-08-11

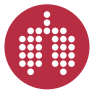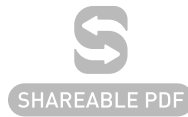

# The carbon footprint of respiratory treatments in Europe and Canada: an observational study from the CARBON programme

Christer Janson <sup>1</sup>, Ekaterina Maslova<sup>2</sup>, Alexander Wilkinson <sup>3</sup>, Erika Penz<sup>4,5</sup>, Alberto Papi <sup>6</sup>, Nigel Budgen<sup>7</sup>, Claus F. Vogelmeier<sup>8</sup>, Maciej Kupczyk<sup>9,10</sup>, John Bell <sup>2</sup> and Andrew Menzies-Gow<sup>11</sup>

<sup>1</sup>Department of Medical Sciences, Respiratory, Allergy and Sleep Research, Uppsala University, Uppsala, Sweden. <sup>2</sup>BioPharmaceuticals Medical, AstraZeneca, Cambridge, UK. <sup>3</sup>East and North Hertfordshire NHS Trust, Stevenage, UK. <sup>4</sup>Department of Medicine, Division of Respiriology, Critical Care and Sleep Medicine, University of Saskatchewan, Saskatoon, SK, Canada. <sup>5</sup>Respiratory Research Centre, University of Saskatchewan, Saskatoon, SK, Canada. <sup>6</sup>Respiratory Medicine, Department of Translational Medicine, University of Ferrara, Ferrara, Italy. <sup>7</sup>Global Sustainability, AstraZeneca, Macclesfield, UK. <sup>8</sup>Department of Medicine, Pulmonary and Critical Care Medicine, University Medical Center Giessen and Marburg, Philipps-University Marburg, Member of the German Center for Lung Research (DZL), Marburg, Germany. <sup>9</sup>Department of Internal Medicine, Asthma and Allergy, Barlicki University Hospital, Medical University of Lodz, Lodz, Poland. <sup>10</sup>Center for Allergy Research, IMM, Karolinska Institutet, Stockholm, Sweden. <sup>11</sup>Lung Division, Royal Brompton Hospital, London, UK.

Corresponding author: Christer Janson ([christer.janson@medsci.uu.se](mailto:christer.janson@medsci.uu.se))

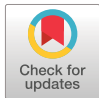

Shareable abstract (@ERSpublications)

**Relievers account for the majority of inhaler use and associated GHG emissions. Implementing treatment guidelines can reduce the unmet need in respiratory care by improving disease control and reducing reliever overuse and the overall carbon footprint.** <https://bit.ly/3zh3c2B>

**Cite this article as:** Janson C, Maslova E, Wilkinson A, *et al.* The carbon footprint of respiratory treatments in Europe and Canada: an observational study from the CARBON programme. *Eur Respir J* 2022; 60: 2102760 [DOI: 10.1183/13993003.02760-2021].

This single-page version can be shared freely online.

Copyright ©The authors 2022.

This version is distributed under the terms of the Creative Commons Attribution Non-Commercial Licence 4.0. For commercial reproduction rights and permissions contact [permissions@ersnet.org](mailto:permissions@ersnet.org)

Received: 20 Oct 2021

Accepted: 5 June 2022

*To the Editor:*

Climate change represents a global challenge and nations are increasingly looking to decarbonise their economies by developing roadmaps for reducing greenhouse gas (GHG) emissions in accordance with international treaties, such as the Paris Agreement [1]. As the healthcare sector remains a key contributor to GHG emissions [2], an examination of the global carbon footprint of its operations and treatment pathways is essential to identify targets for decarbonisation.

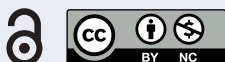

Supplement: ERJ-02760-2021.Shareable.pdf [file ERJ-02760-2021.Shareable.pdf]
